# Supplementary material for: Multilocus sequence analysis for the taxonomic updating and identification of the genus Proteus and reclassification of Proteus genospecies 5 O’Hara et al. 2000, Proteus cibarius Hyun et al. 2016 as later heterotypic synonyms of Proteus terrae Behrendt et al. 2015
Source: PubMed Central journal article supplement (PMC7288399; doi:10.1186/s12866-020-01844-1), 2020-06-10
Supplement: 12866_2020_1844_MOESM1_ESM.pdf [file 12866_2020_1844_MOESM1_ESM.pdf]

1 *BMC Microbiology*

2 **A multilocus sequence analysis for the taxonomic update and identification of the**  
3 **genus *Proteus***

4 Hang Dai<sup>1,2</sup>, Binghuai Lu<sup>3</sup>, Zhenpeng Li<sup>1</sup>, Zhenzhou Huang<sup>1,2</sup>, Hongyan Cai<sup>1,2</sup>, Keyi  
5 Yu<sup>1,2</sup>, Duochun Wang<sup>1,2\*</sup>

6

7 <sup>1</sup>National Institute for Communicable Disease Control and Prevention, Chinese  
8 Center for Disease Control and Prevention (China CDC), State Key Laboratory of  
9 Infectious Disease Prevention and Control, Beijing, 102206, China.

10 <sup>2</sup> Center for Human Pathogen Collection, Chinese Center for Disease Control and  
11 Prevention, Beijing, China.

12 <sup>3</sup> Department of Pulmonary and Critical Care Medicine, China-Japan Friendship  
13 Hospital, Beijing, China.

14

15 Running title: Multilocus sequence analysis of genus *Proteus*.

16 \*Correspondence Author: Duochun Wang, wangduochun@icdc.cn. Changbai Road  
17 155, Changping, Beijing, 102206, China.

18

19

20

21

22 **Supplementary figure legends**

23 *dnaJ*

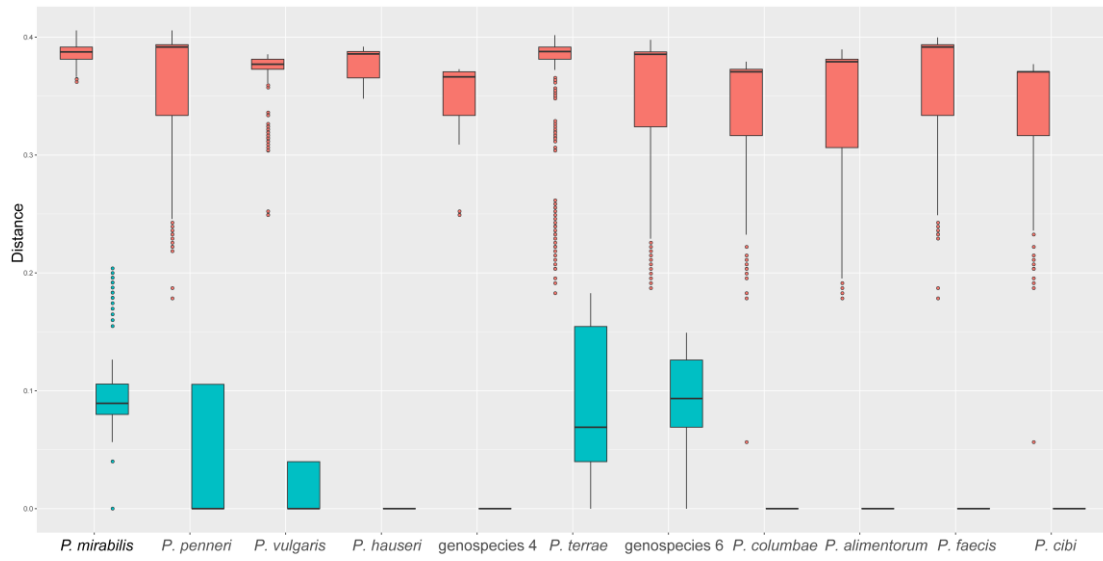

24

25

26 *mdh*

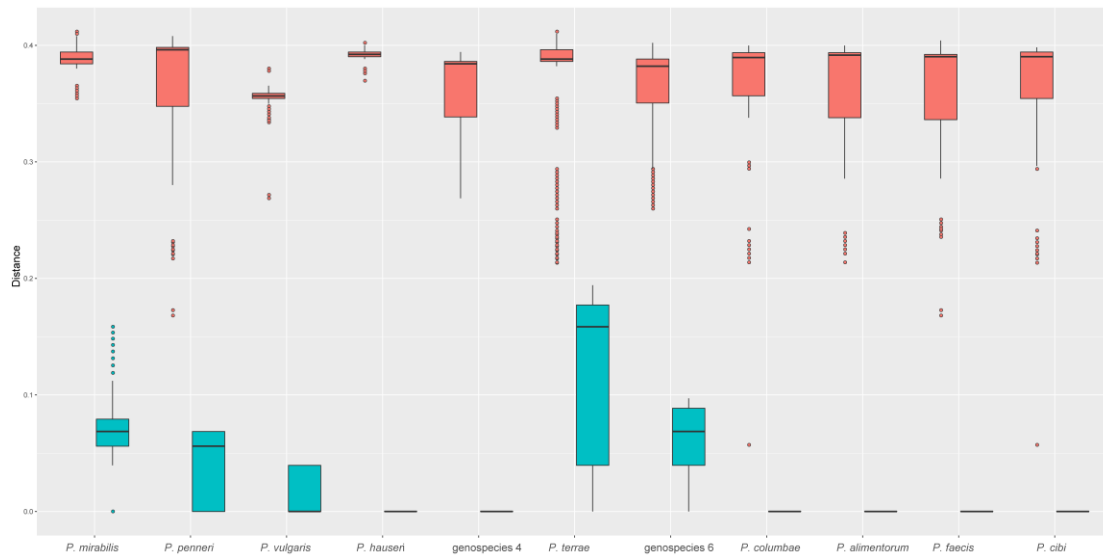

27

28

29 *pyrC*

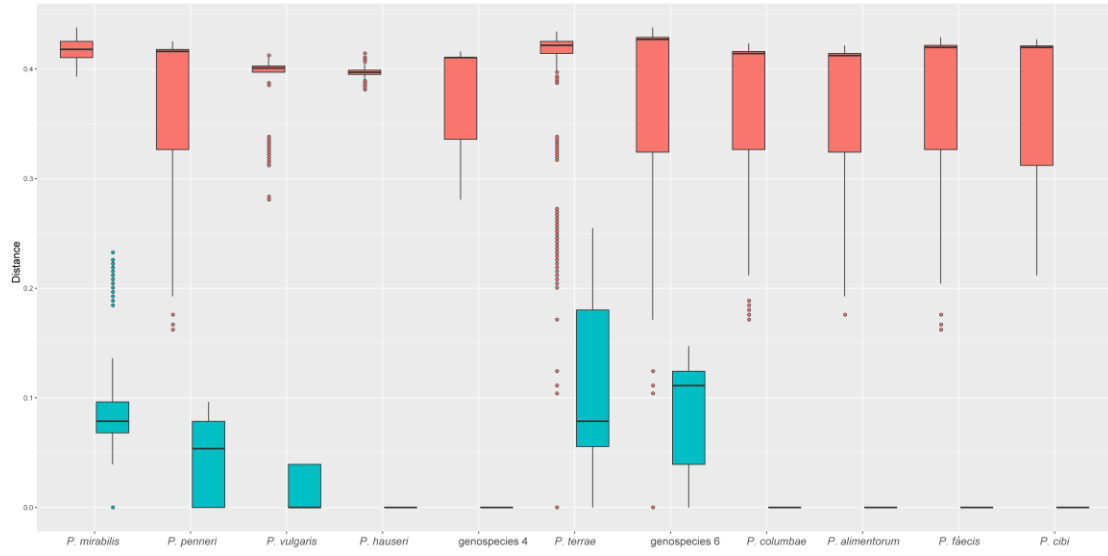

30

31

32 *recA*

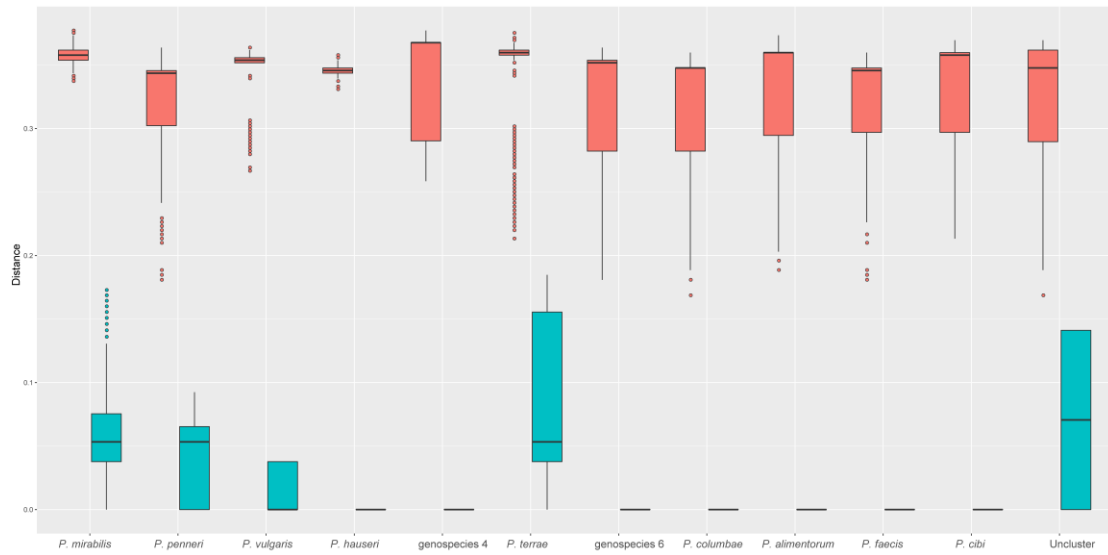

33

34

35 *rpoD*

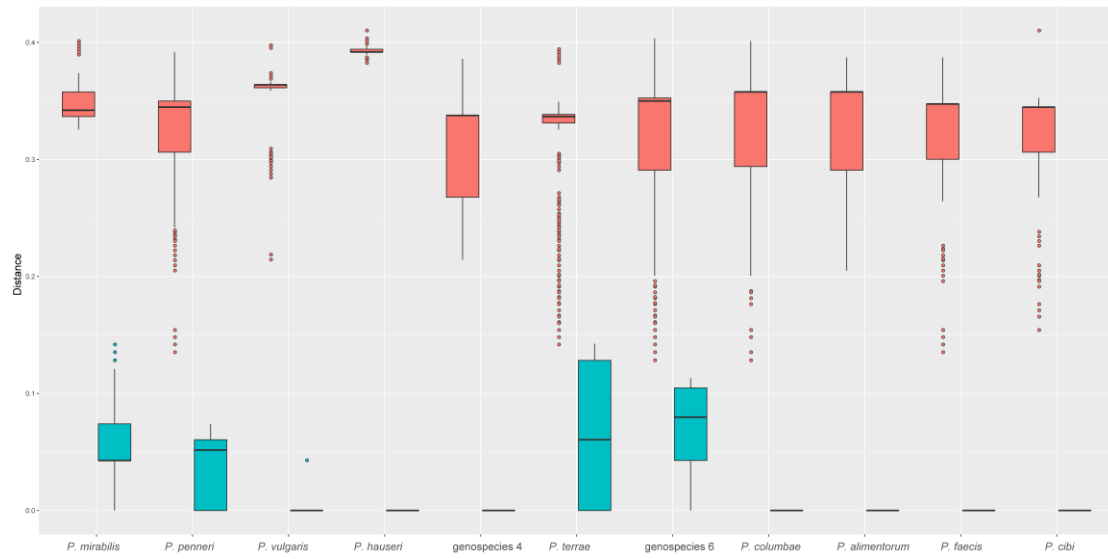

36

37 **Figure S1.** Intra- and inter-species distances of eleven species infer by five individual  
 38 genes. In each boxplot, from bottom to top: minimum, median and maximum.

39

40

41

42

43

44

45

46

47

48

49

50

51

52

53

54

55

56 Table S1. Intra- and inter-species genetic distance median values and ranges of concatenated 5-gene and five individual genes

| Gene         | Intra/inter species | Species (median values [ranges]) |                   |                    |                   |               |                  |               |                    |                       |                  |                |              |      |              |      |              |      |              |      |              |      |              |              |               |
|--------------|---------------------|----------------------------------|-------------------|--------------------|-------------------|---------------|------------------|---------------|--------------------|-----------------------|------------------|----------------|--------------|------|--------------|------|--------------|------|--------------|------|--------------|------|--------------|--------------|---------------|
|              |                     | <i>P. mirabilis</i>              | <i>P. penneri</i> | <i>P. vulgaris</i> | <i>P. hauseri</i> | genospecies 4 | <i>P. terrae</i> | genospecies 6 | <i>P. columbae</i> | <i>P. alimentorum</i> | <i>P. faecis</i> | <i>P. cibi</i> | uncluster    |      |              |      |              |      |              |      |              |      |              |              |               |
| Concatenated | intra               | 0.07                             | [0, 0.17]         | 0.05               | [0, 0.08]         | 0.03          | [0, 0.04]        | 0             | 0                  | 0                     | 0                | 0.09           | [0, 0.17]    | 0.12 | [0, 0.13]    | 0    | 0            | 0    | 0            | 0    | 0            | 0    | 0            | -            | -             |
| 5-gene       | inter               | 0.38                             | [0.37, 0.39]      | 0.38               | [0.17, 0.39]      | 0.37          | [0.26, 0.38]     | 0.38          | [0.37, 0.39]       | 0.37                  | [0.26, 0.38]     | 0.38           | [0.21, 0.39] | 0.38 | [0.21, 0.39] | 0.38 | [0.18, 0.39] | 0.39 | [0.20, 0.39] | 0.38 | [0.17, 0.39] | 0.38 | [0.18, 0.38] | -            | -             |
| <i>dnaJ</i>  | intra               | 0.09                             | [0, 0.20]         | 0                  | [0, 0.11]         | 0             | [0, 0.04]        | 0             | 0                  | 0                     | 0                | 0.07           | [0, 0.18]    | 0.09 | [0, 0.15]    | 0    | 0            | 0    | 0            | 0    | 0            | 0    | 0            | -            | -             |
|              | inter               | 0.39                             | [0.36, 0.41]      | 0.39               | [0.18, 0.41]      | 0.38          | [0.25, 0.39]     | 0.39          | [0.35, 0.39]       | 0.37                  | [0.25, 0.37]     | 0.39           | [0.18, 0.40] | 0.39 | [0.19, 0.40] | 0.37 | [0.06, 0.38] | 0.38 | [0.18, 0.40] | 0.39 | [0.18, 0.40] | 0.37 | [0.07, 0.38] | -            | -             |
| <i>mdh</i>   | intra               | 0.07                             | [0, 0.16]         | 0.06               | [0, 0.07]         | 0             | [0, 0.04]        | 0             | 0                  | 0                     | 0                | 0.16           | [0, 0.19]    | 0.07 | [0, 0.10]    | 0    | 0            | 0    | 0            | 0    | 0            | 0    | 0            | -            | -             |
|              | inter               | 0.39                             | [0.35, 0.41]      | 0.4                | [0.17, 0.41]      | 0.36          | [0.27, 0.38]     | 0.39          | [0.37, 0.40]       | 0.38                  | [0.27, 0.39]     | 0.39           | [0.21, 0.41] | 0.38 | [0.26, 0.40] | 0.39 | [0.06, 0.40] | 0.39 | [0.21, 0.40] | 0.39 | [0.17, 0.40] | 0.39 | [0.06, 0.40] | -            | -             |
| <i>pyrC</i>  | intra               | 0.08                             | [0, 0.23]         | 0.05               | [0, 0.10]         | 0             | [0, 0.04]        | 0             | 0                  | 0                     | 0                | 0.08           | [0, 0.25]    | 0.11 | [0, 0.15]    | 0    | 0            | 0    | 0            | 0    | 0            | 0    | 0            | -            | -             |
|              | inter               | 0.42                             | [0.39, 0.44]      | 0.42               | [0.16, 0.43]      | 0.4           | [0.28, 0.41]     | 0.4           | [0.38, 0.41]       | 0.41                  | [0.28, 0.42]     | 0.42           | [0, 0.43]    | 0.43 | [0, 0.44]    | 0.41 | [0.17, 0.42] | 0.41 | [0.18, 0.42] | 0.42 | [0.16, 0.43] | 0.42 | [0.21, 0.43] | -            | -             |
| <i>recA</i>  | intra               | 0.07                             | [0, 0.14]         | 0.05               | [0, 0.09]         | 0             | [0, 0.04]        | 0             | 0                  | 0                     | 0                | 0.05           | [0, 0.18]    | 0    | 0            | 0    | 0            | 0    | 0            | 0    | 0            | 0    | 0.07*        | [0.0, 0.14]* |               |
|              | inter               | 0.35                             | [0.17, 0.37]      | 0.34               | [0.18, 0.36]      | 0.35          | [0.27, 0.37]     | 0.35          | [0.33, 0.36]       | 0.37                  | [0.26, 0.38]     | 0.36           | [0.21, 0.38] | 0.35 | [0.18, 0.36] | 0.35 | [0.17, 0.36] | 0.36 | [0.19, 0.37] | 0.35 | [0.18, 0.36] | 0.36 | [0.21, 0.37] | 0.35*        | [0.17, 0.37]* |
| <i>rpoD</i>  | intra               | 0.04                             | [0, 0.14]         | 0.05               | [0, 0.07]         | 0             | [0, 0.04]        | 0             | 0                  | 0                     | 0                | 0.06           | [0, 0.14]    | 0.08 | [0, 0.11]    | 0    | 0            | 0    | 0            | 0    | 0            | 0    | 0            | -            | -             |
|              | inter               | 0.34                             | [0.33, 0.40]      | 0.34               | [0.14, 0.39]      | 0.36          | [0.21, 0.40]     | 0.39          | [0.38, 0.41]       | 0.34                  | [0.21, 0.39]     | 0.34           | [0.14, 0.40] | 0.35 | [0.13, 0.40] | 0.36 | [0.13, 0.40] | 0.36 | [0.21, 0.39] | 0.35 | [0.14, 0.39] | 0.34 | [0.15, 0.41] | -            | -             |

\*: The median values and ranges of uncluster in *recA* genes
